# Supplementary material for: Acceptability, usability, and willingness to pay for HIV self‐test kits distributed through community‐based, PLHIV network‐led and private practitioners models in India: Results from the STAR III Initiative
Source: PubMed Central journal article supplement (PMC11310287; doi:10.1002/jia2.26348), 2024-08-08

## **Supplementary materials**

### *Supplementary tables*

Supplementary Table S1: State and district-wise HIVST distribution models implemented under the STAR III study in India

Supplementary Table S2: Questions, responses and dichotomisation of the primary outcomes

### *Supplementary figures*

Supplementary Figure S1: Directed acyclic graph (DAG) of ease of interpreting the HIV self-test result.

Supplementary Figure S2: Directed acyclic graph (DAG) of ease of use of HIV self-testing kit.

Supplementary Figure S3: Directed acyclic graph (DAG) of acceptance of HIV self-testing for next use.

Supplementary Table S1: State and district-wise HIVST distribution models implemented under the STAR III study in India

| State          | District        | Models implemented                                    |
|----------------|-----------------|-------------------------------------------------------|
| ANDHRA PRADESH | EAST GODAVARI   | Community based model                                 |
|                | GUNTUR          | Community based model                                 |
|                | KRISHNA         | Community based model                                 |
|                | KURNOOL         | Community based model                                 |
|                | VISAKHAPATNAM   | Community based model                                 |
|                | GUNTUR          | Community based model                                 |
| DELHI          | DELHI           | Community based model                                 |
| GUJARAT        | AHMEDABAD       | Community based model<br>Private practitioners' model |
|                | VADODARA        | Community based model<br>Private practitioners' model |
| KARNATAKA      | BENGALURU       | Community based model<br>Private practitioners' model |
|                | MYSURU          | Community based model                                 |
| MADHYA PRADESH | BHOPAL          | Community based model                                 |
|                | INDORE          | Community based model                                 |
|                | JABALPUR        | Community based model                                 |
|                | JHABUA          | Community based model                                 |
|                | NEEMUCH         | Community based model                                 |
|                | UJJAIN          | Community based model                                 |
| MAHARASHTRA    | AHMEDNAGAR      | Community based model<br>PLHIV network led model      |
|                | CHANDRAPUR      | Community based model<br>PLHIV network led model      |
|                | JALGAON         | Community based model<br>PLHIV network led model      |
|                | MUMBAI          | Community based model                                 |
|                | MUMBAI SUBURBAN | Community based model                                 |
|                | NAGPUR          | Community based model<br>PLHIV network led model      |
|                | NASHIK          | Community based model<br>PLHIV network led model      |
|                | PUNE            | Community based model<br>PLHIV network led model      |
| MANIPUR        | BISHNUPUR       | Community based model                                 |
|                | CHANDEL         | Community based model                                 |
|                | CHURACHANDPUR   | Community based model                                 |
|                | IMPHAL EAST     | Community based model                                 |
| MIZORAM        | AIZAWL          | Community based model                                 |
|                | CHAMPHAI        | Community based model                                 |
|                | LUNGLEI         | Community based model                                 |

| State         | District         | Models implemented                                    |
|---------------|------------------|-------------------------------------------------------|
|               | MAMIT            | Community based model                                 |
| NAGALAND      | DIMAPUR          | Community based model                                 |
|               | KOHIMA           | Community based model                                 |
|               | MOKOKCHUNG       | Community based model                                 |
|               | TUENSANG         | Community based model                                 |
| PUNJAB        | AMRITSAR         | Community based model                                 |
|               | JALANDHAR        | Community based model                                 |
|               | LUDHIANA         | Community based model                                 |
| TAMIL NADU    | CHENNAI          | Community based model<br>Private practitioners' model |
| TELANGANA     | HYDERABAD        | Community based model<br>Private practitioners' model |
|               | KHAMMAM          | Community based model<br>Private practitioners' model |
|               | WARANGAL         | Community based model<br>Private practitioners' model |
| UTTAR PRADESH | AURAIYA          | Community based model                                 |
|               | KANPUR           | Community based model                                 |
|               | LUCKNOW          | Community based model                                 |
|               | PRAYAGRAJ        | Community based model                                 |
| WEST BENGAL   | KOLKATA          | Community based model<br>Private practitioners' model |
|               | NORTH 24PARAGANA | Community based model<br>Private practitioners' model |

Supplementary Table S2: Questions, responses and dichotomisation of the primary outcomes

| Outcome                                     | Question                                                                                          | Possible responses                                                                                                                                                               | Dichotomisation for analysis                                                                                                                           |
|---------------------------------------------|---------------------------------------------------------------------------------------------------|----------------------------------------------------------------------------------------------------------------------------------------------------------------------------------|--------------------------------------------------------------------------------------------------------------------------------------------------------|
| Acceptability for future use                | The next time when you go for HIV testing, which method would you prefer?                         | 1- HIV self-testing<br>2- Integrated Counselling and Test Centre (ICTC)<br>3- Community-based screening under TI<br>4- Private facility<br>5- Others (specify)<br>6- No response | 1 - HIV self-testing<br>2- All other preferences<br>3 - No response                                                                                    |
|                                             | Which HIVST kit will you prefer? (Only for participants who answered HIVST in the question above) | 1 - Oral-fluid-based HIVST kit<br>2 - Blood-based HIVST kit<br>3 - No response                                                                                                   |                                                                                                                                                        |
| Usability - Ease of using the kit           | How easy did you find using the test?                                                             | 1- Very easy<br>2- Easy<br>3- Neither easy nor difficult<br>4- Difficult<br>5- Very difficult<br>6- No response                                                                  | 1 - Very easy and easy -> Easy to use<br>2 - Neither easy nor difficult, difficult and very difficult -> Not easy to use<br>3 - No response -> Missing |
| Usability - Ease of interpreting the result | How easy was it to interpret the test result?                                                     | 1- Very easy<br>2- Easy<br>3- Neither easy nor difficult<br>4- Difficult<br>5- Very difficult<br>6- No response                                                                  | 1 - Very easy and easy -> Easy to use<br>2 - Neither easy nor difficult, difficult and very difficult -> Not easy to use<br>3 - No response -> Missing |

| Outcome            | Question                                                                                                                                                                                                                                                           | Possible responses                                                                                                                                              | Dichotomisation for analysis                                                                                                  |
|--------------------|--------------------------------------------------------------------------------------------------------------------------------------------------------------------------------------------------------------------------------------------------------------------|-----------------------------------------------------------------------------------------------------------------------------------------------------------------|-------------------------------------------------------------------------------------------------------------------------------|
| Willingness to pay | There is a possibility that in the future the HIVST kit you used as part of this study may not be provided for free to everybody. How much will you be willing to pay for an HIV self-testing kit? (Only for participants who preferred HIVST kits for future use) | 1- Less than 100 rupees<br>2- Between 101 and 250 rupees<br>3- Between 251 and 500 rupees<br>4- More than 500 rupees<br>5- Not willing to pay<br>6- No response | 1 - Not willing to pay -> Not willing to pay<br>2 - Willing to pay any amount -> Willing to pay<br>3 - No response -> Missing |

Supplementary Figure S1: Directed acyclic graph (DAG) of ease of interpreting the HIV self-test result.

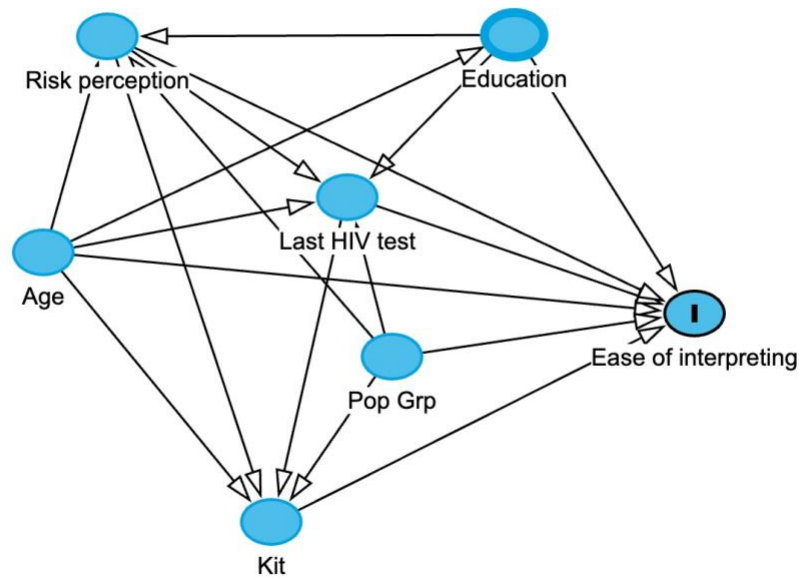

Supplementary Figure S2: Directed acyclic graph (DAG) of ease of use of HIV self-testing kit.

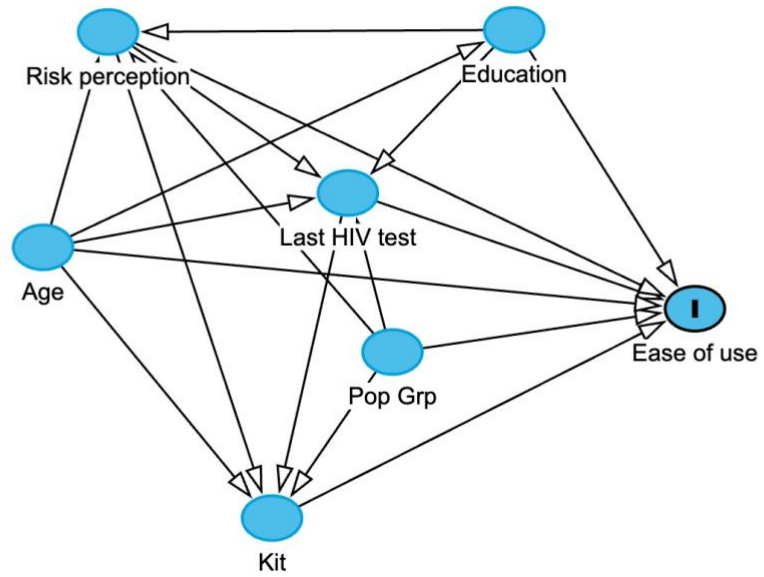

Supplementary Figure S3: Directed acyclic graph (DAG) of acceptance of HIV self-testing for next use.

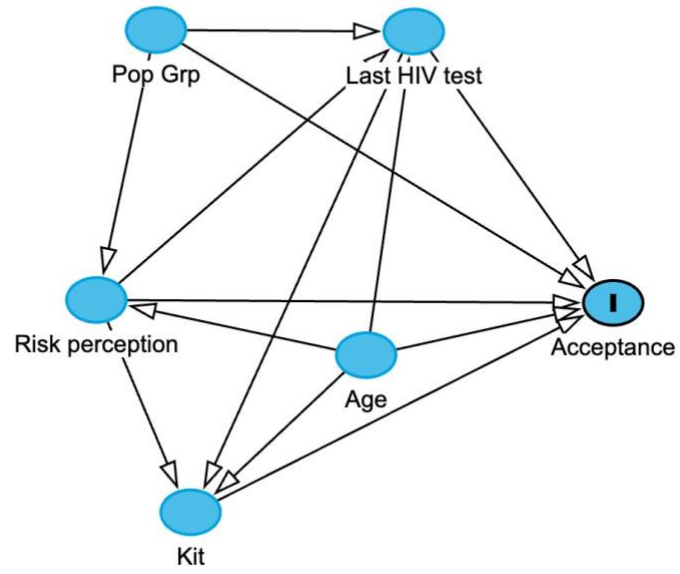

Supplement: JIA2-27-e26348-s001.pdf [file JIA2-27-e26348-s001.pdf]
